# Supplementary material for: A self-consistent approach for determining pairwise interactions that underlie channel activation
Source: PubMed Central journal article supplement — J Gen Physiol. 2014 Nov;144(5):441–55. doi: 10.1085/jgp.201411184 (PMC4210424; doi:10.1085/jgp.201411184), 2014-11
Supplement: supp_jgp.201411184_JGP_201411184_sm.pdf [file supp_jgp.201411184_JGP_201411184_sm.pdf]

Chowdhury et al., <http://www.jgp.org/cgi/content/full/jgp.201411184/DC1>

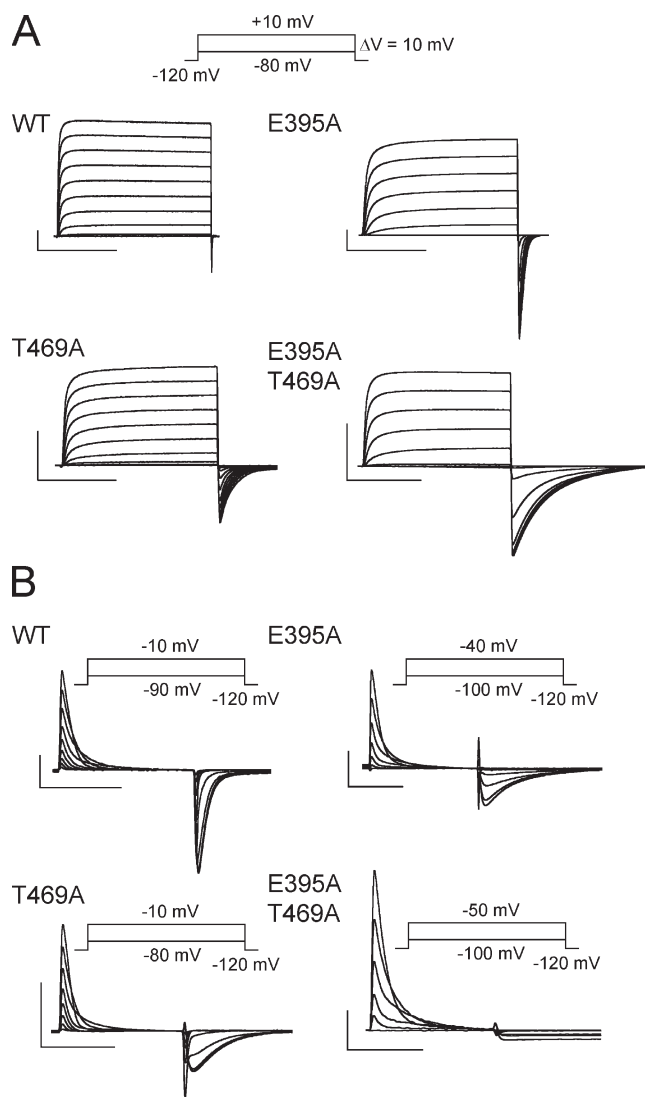

**Figure S1.** A family of ionic and gating current traces for Shaker channel mutants investigated in this study. (A and B) Ionic (A) and gating (B) currents of the WT Shaker channel and its mutants E395A, T469A, and E395A/T469A are shown. Scale bars in A represent 1  $\mu$ A and 50 ms, whereas those in B represent 0.5  $\mu$ A and 25 ms. For the ionic currents (A), all measurements were between  $-80$  and  $10$  mV, and the example traces are all at  $10$ -mV voltage intervals. For gating currents (B), the voltage ranges for the mutants are shown alongside each family of gating current traces. Although gating currents were recorded at  $5$ -mV intervals, for clarity, every alternate trace is shown.

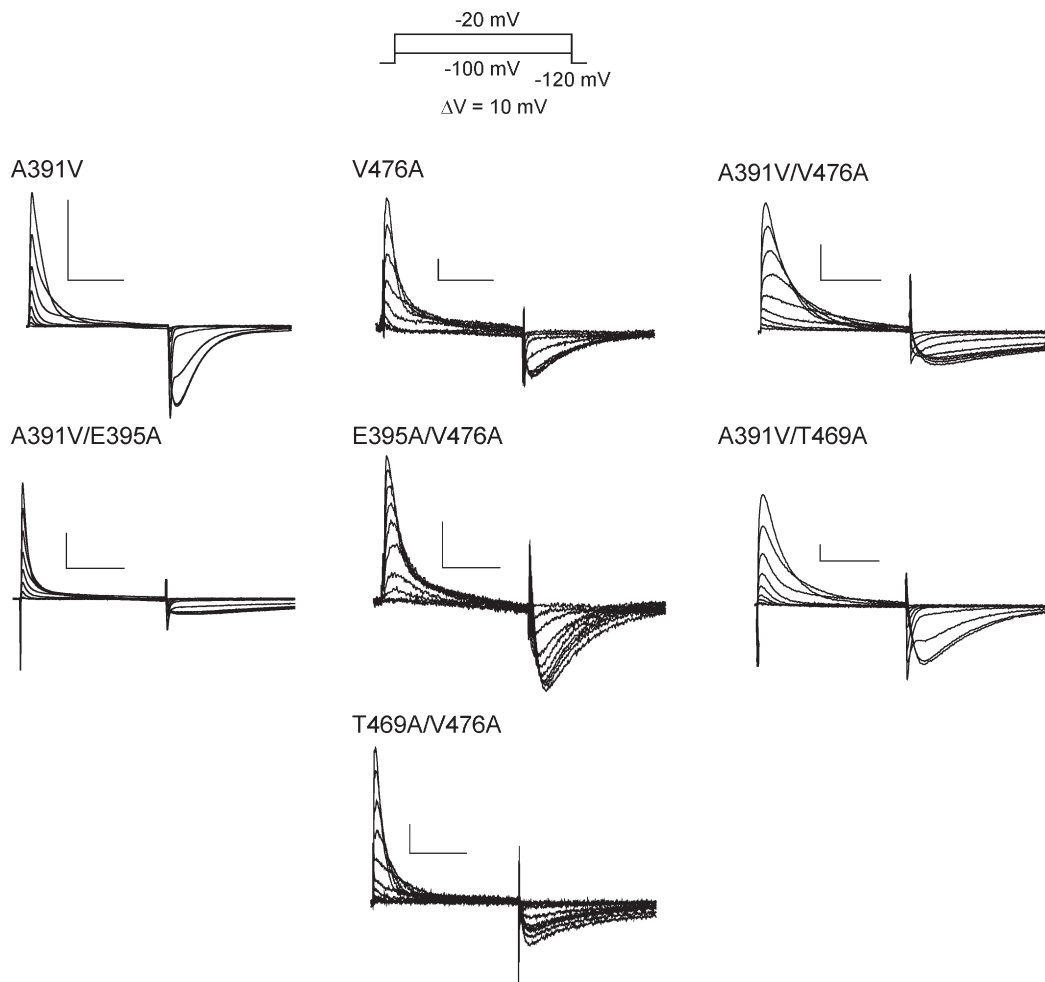

**Figure S2.** Families of gating current traces for Shaker channel pore mutants used in this study. Scale bars in all cases represent 0.5  $\mu\text{A}$  and 20 ms. Although gating currents were measured at 5-mV intervals, for clarity, we show the traces at 10-mV voltage intervals from  $-100$  to  $-20$  mV (inset).
